# 1 **Coronavirus RNA synthesis takes place within membrane-bound sites**

2 Nicole Doyle <sup>1</sup>, Jennifer Simpson <sup>1</sup>, Philippa C Hawes <sup>1</sup> and Helena J Maier <sup>1\*</sup>

3

4 <sup>1</sup> The Pirbright Institute, Ash Road, Woking, Surrey, GU24 0NF, UK; nicole.doyle@pirbright.ac.uk  
5 (N.D.); jennifer.simpson@pirbright.ac.uk (J.S.); pippa.hawes@pirbright.ac.uk (P.C.H.)

6 \* Correspondence: helena.maier@pirbright.ac.uk (H.J.M)

7

## 8 **Abstract**

9 Infectious bronchitis virus (IBV), a gammacoronavirus, is an economically important virus to  
10 the poultry industry as well as a significant welfare issue for chickens. As for all positive  
11 strand RNA viruses, IBV infection causes rearrangements of the host cell intracellular  
12 membranes to form replication organelles. Replication organelle formation is a highly  
13 conserved and vital step in the viral life cycle. Here, we investigate the localization of viral  
14 RNA synthesis and the link with replication organelles in host cells. We have shown that  
15 sites of viral RNA synthesis and virus-related dsRNA are associated with one another and,  
16 significantly, that they are located within a membrane-bound compartment within the cell.  
17 We have also shown that some viral RNA produced early in infection remains within these  
18 membranes throughout infection. Importantly, we demonstrate conservation across all four  
19 coronavirus genera, including SARS-CoV-2. Under-standing more about the replication of  
20 these viruses is imperative in order to effectively find ways to control them.

21

## 22 **Introduction**

23 Coronaviruses (CoVs) are an important family of positive strand RNA (+RNA) viruses  
24 with a wide host range. In humans, some strains of these viruses such as the human  
25 coronavirus (HCoV) 229E can cause the common cold, however there are now three CoVs  
26 that are more pathogenic and cause higher fatality rates. Until 2019, severe acute  
27 respiratory syndrome coronavirus (SARS-CoV) and Middle East respiratory syndrome  
28 coronavirus (MERS-CoV), which were initially isolated in China and Saudi Arabia,  
29 respectively [1, 2] were the most well-known zoonotic viruses in the coronavirus family.  
30 However, the emergence of SARS-CoV-2, causing global mortalities (over 4 million people  
31 at the time of writing [3]) and shut-down of normal life has brought a focus on the danger of  
32 zoonotic viruses, and in particular this virus family [4]. Apart from human viruses,  
33 coronaviruses also cause disease in a range of animal species. Several of these viruses are  
34 of economic importance as they cause infections and loss of income in the global agriculture  
35 industry. These include viruses such as porcine epidemic diarrhea virus (PEDV), porcine  
36 deltacoronavirus (PDCoV), bovine coronavirus (BCoV) and avian infectious bronchitis virus  
37 (IBV). As has recently been highlighted, studying these viruses is of vital importance. Much  
38 work on the CoV family over recent years has been focused on understanding how they  
39 interact with the host cell, including a key part of their life cycle, the induction of membrane  
40 rearrangements or replication organelles (ROs).

41 As obligate intracellular parasites, viruses rely on their host cells to provide not only a  
42 site for replication, but much of the cellular machinery required to produce new virus  
43 particles. All +RNA viruses induce the rearrangement of intracellular membranes to form  
44 ROs [5-7]. These viral ROs have been shown to be the site of viral RNA synthesis [8, 9],  
45 however it is probable that they also offer other benefits to the virus. The ROs are likely to  
46 provide a way to shield replicative intermediates which would otherwise be recognized by  
47 cellular defenses and spark an innate immune response [10, 11]. It has also recently been  
48 shown that ROs could be a site of local ATP production for the energy-intensive process of  
49 RNA synthesis which takes place there [12]. The structures formed vary between virus  
50 families but do share similarities in structures such as convoluted membranes, double  
51 membrane vesicles (DMVs) and spherules [13, 14]. Several viruses, such as toroviruses  
52 [15], hepatitis C virus (HCV; [16]) and picornaviruses such as foot and mouth disease virus  
53 (FMDV; [17]) induce the formation of tubules or paired membranes as well as  
54 single-membrane vesicles, DMVs or multi-lamellar vesicles. In enterovirus infections  
55 single-membrane tubules transform into DMVs and multilamellar vesicles over the course of  
56 infection [18, 19], using endoplasmic reticulum (ER) and Golgi membranes to initiate the  
57 formation of these structures [20]. A different structure induced by many other +RNA viruses  
58 are spherules or invaginated vesicles. These structures are smaller than DMVs and are  
59 pinched out from various intracellular membranes but because they remain bound to that  
60 membrane, they possess a channel which connects their interior to the cytoplasm. Viruses  
61 that induce spherule formation include flaviviruses [21-23], nodaviruses [24], bromoviruses  
62 [25] and alphaviruses such as Semliki Forest virus (SFV). In the case of SFV ROs, the  
63 spherules and the cytopathic vacuoles which contain them have been shown to be the site of  
64 viral RNA synthesis [26-28]. For flock house nodavirus (FHV), spherules have been found to  
65 form from the mitochondrial membrane [29] and these structures have also been shown to  
66 be the site of viral RNA synthesis, containing bundles of dsRNA [30, 31].

67 The possibility of antiviral therapies targeting the ROs has meant an increased  
68 attraction for understanding this part of the viral life cycle in recent years. Until very recently,  
69 the structures of ROs formed by the CoV family were split into the alpha- and beta-CoVs and  
70 the gamma- and delta-CoVs. The alpha- and beta-CoVs were known to induce convoluted  
71 membranes and DMVs [9, 32-35], and while DMVs are also produced by gamma- and  
72 delta-CoVs, these were seen alongside areas of tightly paired ER membranes called  
73 zippered ER (zER) and small double membrane spherules which, in IBV infected cells, have  
74 been shown to remain tethered via an open neck to the zER [36, 37]. However, it has  
75 recently been shown that alpha- and beta-CoVs also induce spherules, although with some  
76 morphological differences. They are formed to a lesser extent, and while some spherules  
77 appear to be connected to the convoluted membrane, many more were seen as sealed  
78 structures. While some sealed spherule structures were seen in IBV infection in the later  
79 study, this was to a lesser extent [8]. The significance of these differences between  
80 structures is not yet clear and is the source of further investigation.

81 As ROs have long been purported to provide a site for viral RNA synthesis, a key point  
82 for investigation has been in understanding exactly where the sites of viral replication are

83 within the cell, and the involvement of ROs in the process. For SARS-CoV, it has been  
84 shown using biochemical methods *in vitro* that sites of viral RNA synthesis are protected by  
85 membranes, possibly within DMVs [38], and dsRNA signal was shown to be associated with  
86 DMVs and CM using immunostaining [39]. SARS-CoV-2 DMVs have also recently been  
87 shown to contain RNA filaments consistent with the size of dsRNA [40]. It is assumed that  
88 DMVs in mouse coronavirus (MHV) play a role in viral RNA synthesis based on the fact that  
89 mutations in one of the non-structural proteins, nsp4, affects both DMV formation and viral  
90 RNA synthesis [41, 42]. DMVs were known to be necessary for viral replication [43] and  
91 while DMVs have long been associated with sites of viral RNA synthesis [9], this theory was  
92 always hampered by the fact that DMVs were shown to be closed compartments with no  
93 way for newly synthesized viral RNA to escape for packaging and egress. However, DMVs  
94 have now been shown to be a site of viral RNA synthesis [8] and further recent findings  
95 demonstrated a small number of transient pores in the membranes of MHV DMVs, allowing  
96 egress of newly synthesized viral RNA [44]. The role of spherules remains to be elucidated.

97 The gammacoronavirus, IBV is a virus of economic importance to the global poultry  
98 industry, causing a highly contagious respiratory disease of chickens and other poultry.  
99 Infection results in reduced quantity of eggs and reduced quality of eggs and meat as well as  
100 impacting on animal welfare. Recent work has elucidated the role of ROs in viral RNA  
101 synthesis and suggested a pathway for nascent RNA to leave the DMV via a molecular pore  
102 [44]. However, conclusive proof of viral RNA synthesis occurring within the DMV was still  
103 lacking and the possibility remained that synthesis was taking place on the outer surface of  
104 DMVs. Here, we show that IBV viral RNA synthesis takes place within membrane-bound  
105 compartments, and we demonstrate that this is conserved across all four genera of the CoV  
106 family.

107

## 108 **Materials and Methods**

### 109 *Cells and viruses*

110 Avian DF1 cells (LGC Standards Ltd.) were maintained in DMEM (Sigma Aldrich,  
111 Gillingham, UK) supplemented with 10% FBS (Sigma Aldrich) at 37 °C 5% CO<sub>2</sub>. IBV (strain  
112 BeauR [45]) infections were carried out in 1xBES medium (MEM, 0.3% tryptose phosphate  
113 broth, 0.2% bovine serum albumin, 20 mM N,N-Bis(2-hydroxyethyl)-2-aminoethanesulfonic  
114 acid (BES), 0.21% sodium bicarbonate, 2 mM L-glutamine, 250 U/mL nystatin, 100 U/mL  
115 penicillin, and 100 U/mL streptomycin). Huh7 cells (ATCC) were maintained in DMEM  
116 supplemented with 10% FBS. Human coronavirus 229E (HCoV 299E (UK Health Security  
117 Agency) infections were carried out in DMEM + 2% FBS. VeroE6 cells (LGC Standards Ltd.)  
118 were maintained in DMEM supplemented with 10% FBS. SARS-CoV-2 (strain  
119 hCov-19/England/02/2020, kindly provided by Prof Miles Carroll, UK Health Security  
120 Agency) infections were carried out in DMEM + 2% FBS. Porcine LLC-PK1 cells (ATCC  
121 CL-101 [46]) were maintained in DMEM supplemented with 10% FBS. PDCoV (strain  
122 OH-FD22, kindly provided by Prof Linda Saif, Ohio State University, [47, 48]), infection was  
123 carried out in EMEM + 1% HEPES, 1% non-essential amino acids, 1% antibiotic/antimycotic  
124 and 0.25 µg/mL trypsin. In all cases, cells were inoculated with virus for 1 h, after which time

125 the inoculum was replaced with infection media specific to each virus. Cells were then  
 126 incubated until specified timepoints.  
 127

128 *Labeling of nascent viral RNA with bromouridine*

129 Cells seeded onto glass coverslips were infected as in 2.1. Cells were then treated with 2  
 130 mM (or 4 mM for HCoV 229E) bromouridine (BrU; Sigma Aldrich) and 15  $\mu$ M actinomycin D  
 131 (ActD; Sigma Aldrich) at 30 min prior to each timepoint. Cells were washed in PBS, fixed in  
 132 RNase-free paraformaldehyde (pfm) at each timepoint, then labeled as in 2.3.  
 133 For pulse chase experiments, cells were pulsed with BrU and ActD for 1 h at concentrations  
 134 previously used. After this time, control cells were fixed in RNase-free pfm, while the rest  
 135 were chased with 50  $\mu$ M uridine (Sigma Aldrich) to out-compete the labeled BrU. Cells were  
 136 incubated in uridine and ActD until 24 hpi then fixed as above and labeled as in 2.3.  
 137

138 *Immunofluorescence labeling*

139 Cells seeded onto glass coverslips were mock-infected or infected as laid out in 2.1. and 2.2.  
 140 At each timepoint, cells were washed in PBS then fixed for 15 min in 4% pfm in PBS at room  
 141 temperature. Cells were permeabilized in 0.1% Triton X-100 in PBS for 15 min, or 0.25%  
 142 digitonin (BioVision Inc) in PBS for 10 min then incubated in blocking buffer (0.1% fish  
 143 gelatin [Sigma Aldrich] in PBS) for 1 h. Primary antibodies specific for proteins of interest  
 144 (Table 1) were diluted in blocking buffer and incubated on cells for 1 h. After washing, Alexa  
 145 Fluor secondary antibody (Invitrogen) in blocking buffer was incubated on cells for 1 h,  
 146 followed by washing, labeling of nuclei using 4',6-diamidino-2-phenylindole (DAPI; Sigma  
 147 Aldrich) or ToPro3 (ThermoFisher) and mounting onto glass slides with Vectashield (Vector  
 148 Labs, Peterborough).  
 149 For labeling of BrU samples, in order to prevent loss of the BrU signal, immunofluorescence  
 150 (IF) labeling was promptly carried out in an RNase-free environment in the presence of  
 151 RNasin at 0.133 U/ml (Promega, Southampton; [49]).  
 152 Cells were visualized using a Leica CLSM SP5, SP8 or Stellaris 5 microscope (Leica  
 153 Microsystems, Milton Keynes, UK). Super-resolution (stimulated emission depletion  
 154 (STED)) microscopy was performed using a Leica TCS SP8 STED 3X microscope with  
 155 inverted stand. STED Images were deconvolved using Huygens Professional software  
 156 18.10 (Scientific Volume Imaging, Netherlands). Figures were assembled using Adobe  
 157 Photoshop.  
 158

159 **Table 1.** Table showing antibodies used in this paper

| Antibody name in text | Antibody target                    | Source                                                         |
|-----------------------|------------------------------------|----------------------------------------------------------------|
| dsRNA                 | J2 dsRNA                           | Scicons (English and Scientific Consulting, Budapest, Hungary) |
| Nsp12                 | IBV RdRp (nsp12)                   | Maier <i>et al</i> mBio '13                                    |
| IBV                   | IBV structural proteins (S, M & N) | Abcam                                                          |
| PDI                   | PDI                                | Enzo                                                           |
| b-tubulin             | b-tubulin                          | ThermoFisher                                                   |
| BrU                   | Anti-Bromodeoxyuridine             | Roche, Sigma                                                   |
| 229E N                | HCoV 229E N protein                | MRC PPU Reagents and Services                                  |
| SARS2 N               | SARS-CoV2 N protein                | MRC PPU Reagents and Services                                  |
| PDCoV N               | PDCoV NP antigen                   | 2B Scientific                                                  |

160

## 161 **Results**

162 *DsRNA is found in membrane-bound compartments.*

163 We have shown previously over the course of the IBV life cycle that nsp12, the viral  
164 RNA-dependent RNA polymerase (RdRp), does not colocalize with dsRNA [37]. The role of  
165 dsRNA is still a source of interest, but it is most likely to be a replicative intermediate, formed  
166 during the replication of the viral genome. Interestingly, dsRNA has recently been shown to  
167 be largely negative-sense viral RNA [50]. It has been shown in SARS-CoV that dsRNA is  
168 found within DMVs, which are quite likely to store it, hidden from detection by intracellular  
169 pattern recognition receptors [39]. The formation of dsRNA is a well conserved step across  
170 +RNA virus families so we sought to understand whether dsRNA is also protected within  
171 membrane-bound compartments in IBV infection using different permeabilization agents.  
172 Digitonin is a weak permeabilizing agent, which can be used at low concentrations to  
173 selectively permeabilize the plasma membrane but not intracellular membranes, while Triton  
174 X-100 (TX100) permeabilizes all cellular membranes. Mock-infected DF1 cells were  
175 permeabilized with TX100 (Fig 1, top) or digitonin (Fig 1, bottom), then labeled with  
176 antibodies specific for PDI and tubulin. Tubulin proteins are found in the cytoplasm, so  
177 tubulin labeling was visible upon either TX100 or digitonin permeabilization. In contrast,  
178 labeling of PDI, the intra-lumenal ER protein is lost with digitonin treatment as the antibody is  
179 prevented from accessing its target. DF1 cells infected with IBV and fixed at timepoints  
180 during the infection cycle as indicated (Fig 1) were similarly processed. On the top row, cells  
181 permeabilized with TX100 clearly show both nsp12 (green) and dsRNA (red) labeling, with  
182 the dsRNA labeling increasing markedly over the course of infection. However, when cells  
183 were permeabilized with digitonin (Fig 1, bottom row), dsRNA was no longer visible in the  
184 cells, indicating that it is held within an intracellular membrane and therefore inaccessible to  
185 the antibody. In comparison, nsp12 staining was unaffected when cells were permeabilized  
186 with digitonin (Fig 1), indicating that it is not contained within a membrane but is possibly free  
187 in the cytoplasm or on the cytoplasmic face of a membrane.  
188

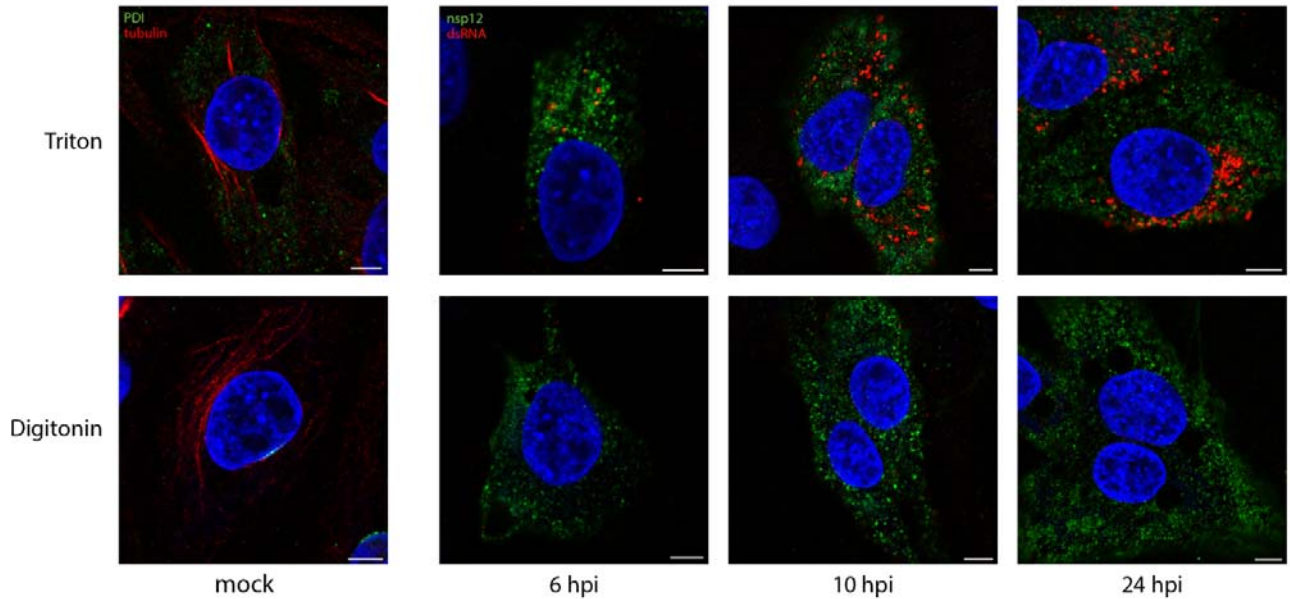

189

190 **Figure 1. DsRNA is contained within a membrane-bound compartment whilst nsp12 is**  
191 **exposed to the cytoplasm.**

192 DF1 cells were infected with IBV and fixed at the indicated times post infection. Cells were  
193 permeabilized with either Triton X-100 (all membranes permeabilized; top row), or digitonin (plasma  
194 membrane permeabilized only; bottom row). Cells were labeled with dsRNA (red) and nsp12 (green),  
195 or for the mock control (first column), tubulin (red) and PDI (green). Nuclei are labeled blue with DAPI  
196 (blue). Scale bars represent 5  $\mu$ m.

197

198

199 *DsRNA is closely associated with sites of viral RNA synthesis.*

200 Knowing that dsRNA was likely within the DMVs, we sought to understand how it associated  
201 with sites of viral RNA synthesis. To do this, the uridine analog bromouridine (BrU) was  
202 incorporated into the nascent viral RNA. DF1 cells were infected with IBV then incubated in  
203 media containing BrU for 30 min prior to fixation to provide a snapshot of RNA synthesis at  
204 that timepoint. The cellular transcription inhibitor, Actinomycin D (ActD) was used to  
205 selectively inhibit cellular transcription to allow visualization of sites of active viral RNA  
206 synthesis (Fig S1). Starting at 4 hpi, sites of viral RNA synthesis (Fig 2, green) were detected  
207 as small foci localized in the perinuclear region. As infection progressed, these sites of viral  
208 RNA synthesis increased in size and distribution around the cell, although more often than  
209 not retaining their perinuclear distribution. A similar pattern was observed for both nsp12 and  
210 dsRNA labeling (red), however while nsp12 labeling was generally diffuse over the  
211 cytoplasm, dsRNA labeling remained punctate and tended to accumulate in perinuclear  
212 regions, especially earlier in infection (Fig 2b). Over the course of infection with IBV, nsp12  
213 did not colocalize with BrU (Fig 2a). This was surprising as we would expect the viral RdRp  
214 to be at sites of viral RNA synthesis, however no colocalization could be found even when  
215 analyzed in 3D (Fig S2 and Video S3) or using super resolution microscopy (Fig 2c). In

216 contrast, dsRNA, appeared to exhibit a low level of colocalization or overlap with BrU signal  
217 at earlier timepoints, particularly in larger foci and as infection progressed, the overlap  
218 appeared to increase (Fig 2b). Using super-resolution microscopy, we confirmed that rather  
219 than tightly colocalizing, dsRNA and BrU signal were instead in close association with each  
220 other (Fig 2c). These results show that dsRNA, while not appearing to be completely  
221 colocalized with BrU-labeled nascent RNA, is closely associated with these sites of viral  
222 RNA synthesis.

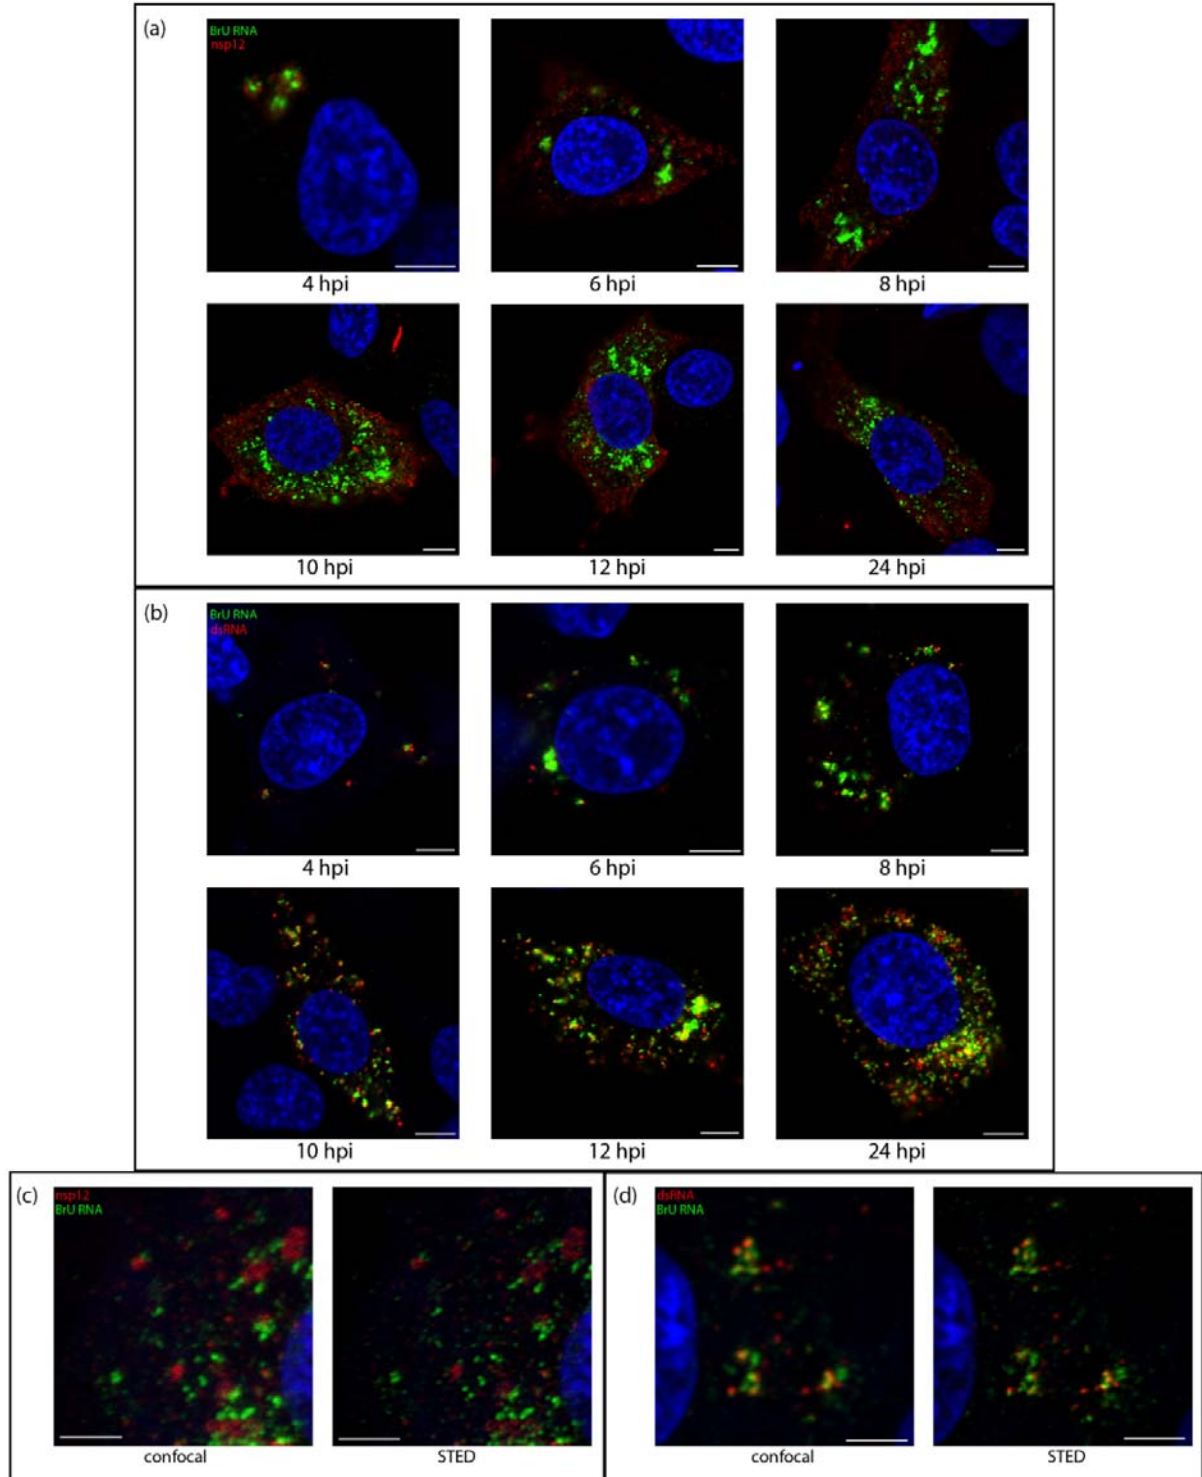

223

224  
225

**Figure 2. Sites of viral RNA synthesis are associated with dsRNA but do not colocalize with nsp12.**

226  
227  
228  
229

DF1 cells were infected with IBV and 30 mins prior to fixation treated with BrU and ActD. Cells were fixed at the indicated time points post infection and labeled with antibodies against BrU (green) and a) nsp12 (red) or b) dsRNA (red). Nuclei are labeled with DAPI (blue). Scale bars represent 5 μm. (c & d) Cells were treated as in (a & b), fixed at 10 hpi and labeled for BrU (green) and c) nsp12 or d) dsRNA



230 (red) and ToPro3 (blue) for the nuclei. A confocal image was captured followed by a super-resolution  
231 images which was captured using a STED microscope, then deconvolved. Scale bars represent 3  $\mu$ m.

232

233 *Sites of viral RNA synthesis are membrane-protected.*

234 Snijder *et al* [8] showed that sites of viral RNA synthesis are associated strongly with ROs, in  
235 particular they showed they were more strongly associated with DMVs. While they  
236 subsequently showed that DMVs have a pore which would allow for the egress of newly  
237 synthesized viral RNA, the question of pinpointing nascent viral RNA within these structures  
238 remained [44]. Here it has been demonstrated that sites of IBV viral RNA synthesis and  
239 dsRNA are closely associated rather than precisely colocalized. Since we had already  
240 shown that dsRNA was within membrane-bound compartments, this left the question open  
241 as to whether the sites of viral RNA synthesis might be on the outside of these vesicles. DF1  
242 cells were infected and treated with BrU and ActD as before, followed by IF labeling using  
243 either TX100 or digitonin permeabilization. As in previous experiments, the labeling pattern  
244 of newly synthesized viral RNA in TX100-permeabilized cells increased through the course  
245 of infection from smaller puncta to larger foci, mostly centered in perinuclear regions (Fig 3,  
246 top row). Through the course of infection, nsp12 signal was unaffected by digitonin  
247 permeabilization (Fig 3 and as before, in Fig 1). Strikingly however, much of the BrU signal  
248 at these timepoints was not detectable following digitonin permeabilization (Fig 3, bottom  
249 row). Although some newly synthesized viral RNA was found in the cytoplasm, this  
250 observation indicates that a large proportion of newly synthesized viral RNA is bound within  
251 a membrane. Overall viral RNA labeling followed a very similar staining pattern to dsRNA  
252 (as seen in Fig 1) and suggests that nascent viral RNA is located within the same  
253 membrane-bound compartments as dsRNA.

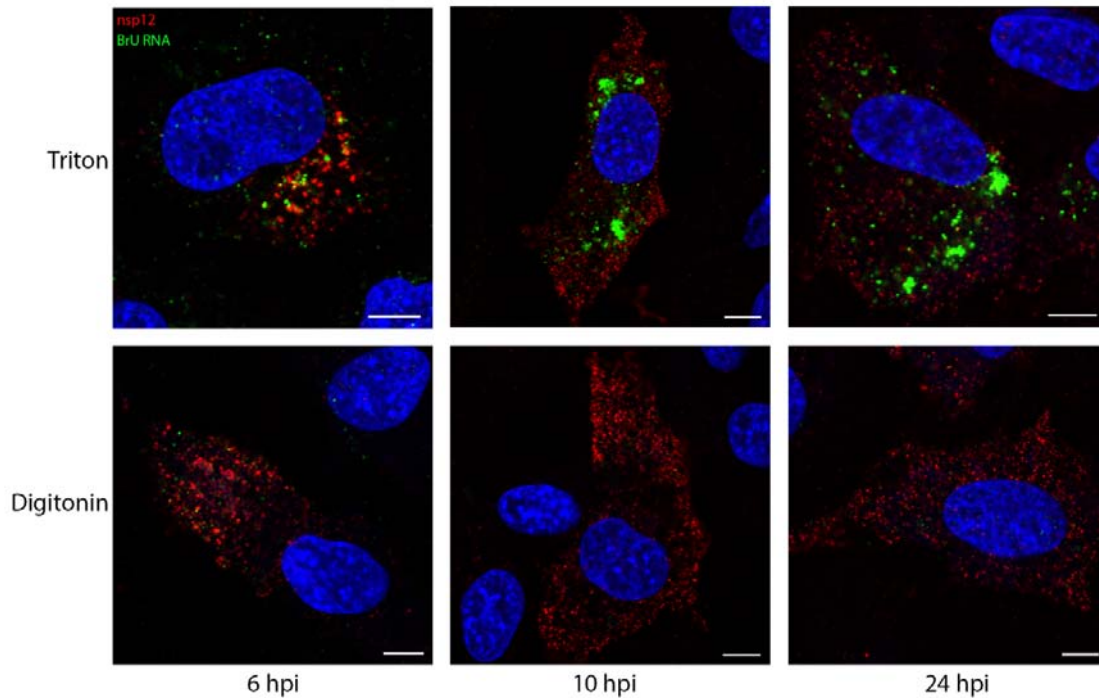

254

255 **Figure 3. Viral RNA synthesis takes place in a membrane-bound compartment.**

256 DF1 cells were infected with IBV. 30 mins prior to fixation, cells were treated with BrU and ActD. Cells  
257 were fixed at the indicated times post infection. Cells were permeabilized with Triton X-100 (all  
258 membranes; top row) or digitonin (plasma membrane; bottom row) then labeled for nsp12 (red) and  
259 BrU (green), nuclei labeled with DAPI (blue). Scale bars represent 5  $\mu$ m.

260

261 *Viral RNA is transported to the cytoplasm later in infection.*

262 To trace the fate of viral RNA synthesized early in infection and find out whether viral RNA  
263 produced within membrane-bound compartments is transported to the cytoplasm, cells were  
264 successively exposed to labeled uridine in the form of bromouridine (pulse) and then to  
265 unlabeled uridine (chase). In these pulse-chase experiments, viral RNA produced between  
266 7-8 hpi was labeled with BrU as before, followed by a chase with excess unlabeled uridine  
267 until fixation at 24 hpi. The localization of viral RNA at 8 hpi was in cytoplasmic puncta,  
268 consistent with earlier observations (Fig 4a, left). When this viral RNA was chased to 24 hpi,  
269 it was found localized in large cytoplasmic puncta but also diffuse within the cytoplasm. (Fig  
270 4a, right). To gain further information, cells were permeabilized with TX100 or digitonin as  
271 before. In control cells fixed at 8 hpi and permeabilized with TX100 or digitonin, labeling of  
272 the viral RNA was as before (Fig 4b, left). In the pulse-chased samples, the large foci of  
273 BrU-labeled RNA were no longer visible. However, the diffuse cytoplasmic signal was still  
274 detected (Fig 4b, right). Therefore, one pool of RNA was located within a membrane-bound  
275 compartment and a second was free in the cytoplasm. To investigate whether the  
276 cytoplasmic viral RNA might be in the process of being packaged, we looked to confirm that  
277 it colocalizes with viral structural proteins. Therefore, cells were labeled with an antibody  
278 specific for viral structural proteins (spike, membrane and nucleocapsid proteins). The

279 colocalization between these markers (Fig 4c, top) indicates that the diffuse cytoplasmic  
280 staining pattern of BrU-labeled viral RNA is associated with structural proteins. In contrast,  
281 dsRNA was shown to colocalize with the large membrane-bound foci (Fig 4c, bottom).  
282

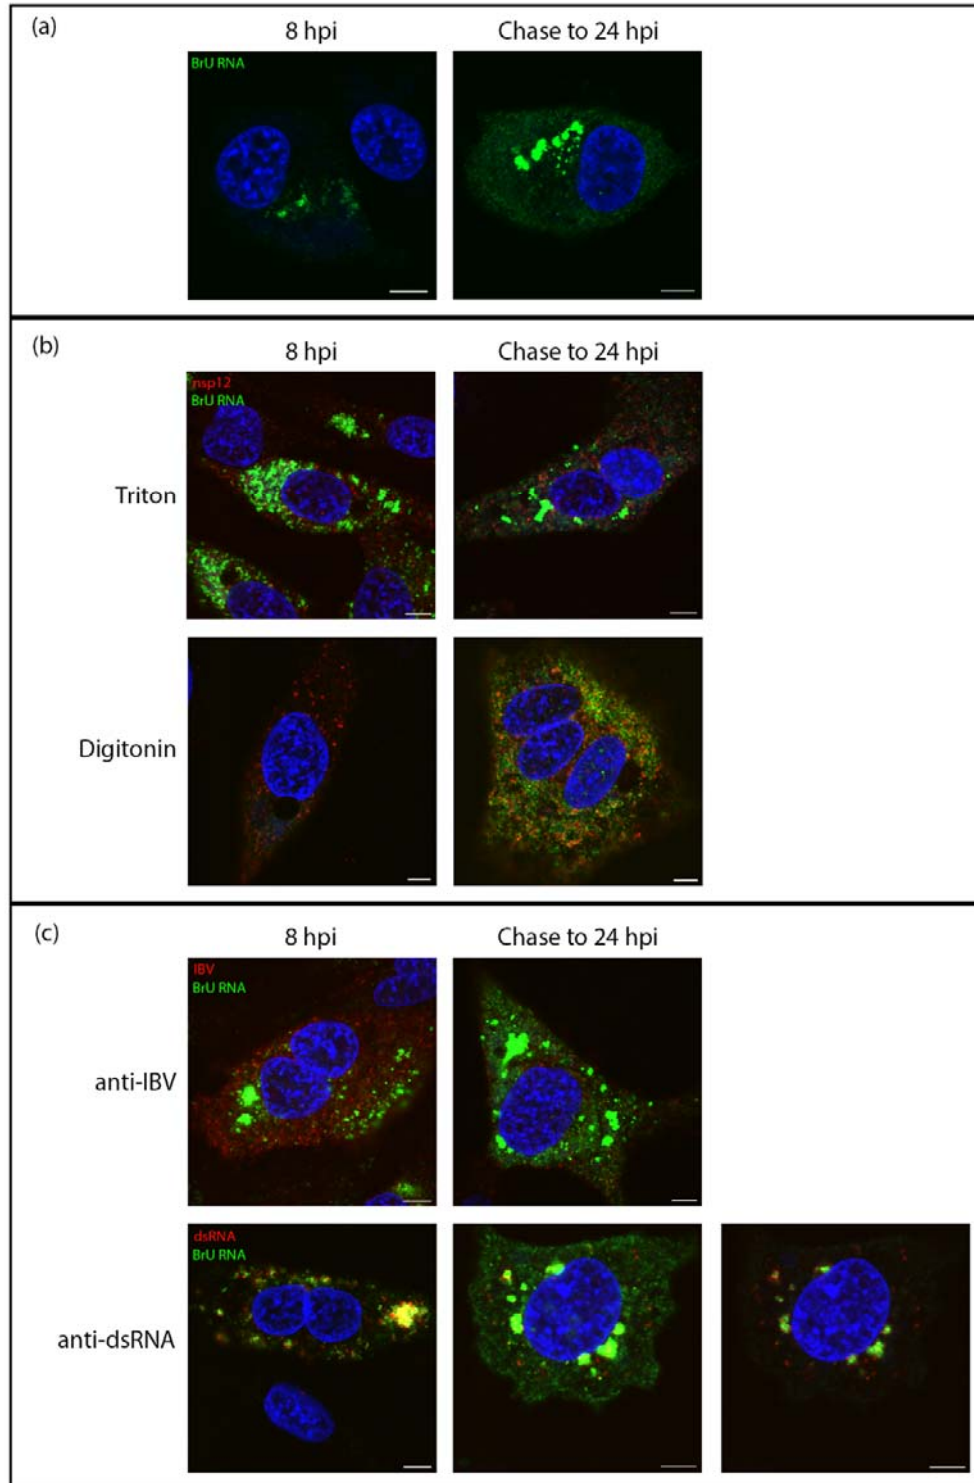

283

284

Figure 4. Viral RNA is transported to the cytoplasm later in infection

285 DF1 cells were infected with IBV. At 7 hpi cells were treated with BrU and ActD. At 8 hpi cells were  
286 either fixed (8 hpi) or chased with uridine until 24 hpi (chase to 24 hpi). Cells were labeled for BrU  
287 (green) and (b) nsp12, (c) IBV or (d) dsRNA (red), DAPI labeling nuclei (blue). Scale bars represent 5  
288  $\mu\text{m}$ .

289  
290

291 *RNA synthesis by all genera of coronaviruses takes place in a membrane-bound*  
292 *compartment.*

293 While the structure of ROs has been shown to be conserved across all genera of CoVs,  
294 some morphological differences between the viruses do remain. Mainly, while convoluted  
295 membranes are found much more widely in alpha and beta CoV, they are found to a lesser  
296 extent in delta- and gamma-CoVs. In alpha- and beta-CoVs, the spherules were found  
297 associated with CM rather than zER and the majority of spherules were sealed  
298 compartments rather than remaining open to the cytosol as is the case in the majority of  
299 spherules in gamma-CoV infections [8]. We therefore sought to understand whether there  
300 might be any fundamental differences between the localization of sites of viral RNA  
301 synthesis in IBV compared with other CoV genera. Using one representative virus from each  
302 of the three other genera of CoVs (HCoV 229E (an alpha-CoV), SARS-CoV-2 (a beta-CoV)  
303 and PDCoV (a delta-CoV)), the location of nascent viral RNA labeled with BrU was  
304 assessed using TX100 and digitonin as before. Cells were labeled to detect BrU labeled  
305 nascent viral RNA or the viral nucleocapsid (N). While for each virus the N labeling (in red)  
306 was detected diffuse throughout the cytoplasm regardless of permeabilization method,  
307 BrU-labeled nascent viral RNA signal (in green) was contained within a membrane-bound  
308 compartment for HCoV 229E (Fig 5a), SARS-CoV-2 (Fig 5b) and PDCoV (Fig 5c). This is  
309 consistent with observations for IBV and demonstrates a conserved mechanism across the  
310 CoV family for viral RNA synthesis to be held within a membrane-bound compartment.

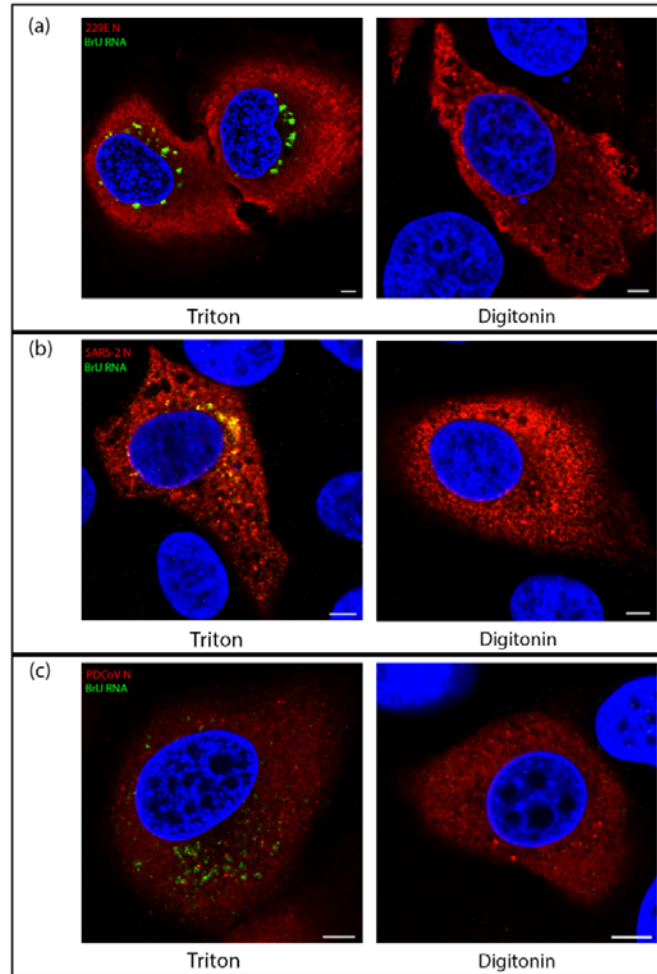

311

312 **Figure 5. Viral RNA synthesis of diverse CoVs takes place within a membrane-bound**  
313 **compartment.**

314 (a) Huh7 cells were infected with HCoV 229E. At 7.5 hpi cells were treated with BrU and ActD for 30  
315 min before fixation at 8 hpi. Cells were permeabilized with Triton X-100 (left) or digitonin (right) then  
316 labeled for BrU (green) and N (red), DAPI labeling the nuclei (blue). (b) VeroE6 cells were infected  
317 with SARS-CoV-2. At 5.5 hpi cells were treated with BrU and ActD for 30 min before fixation at 6 hpi.  
318 Cells were permeabilized with Triton X-100 (left) or digitonin (right) then labeled for BrU (green) and N  
319 (red), DAPI labeling the nuclei (blue). (c) LLC-PK1 cells were infected with PDCoV. At 5.5 hpi cells  
320 were treated with BrU and ActD for 30 min before fixation at 6 hpi. Cells were permeabilized with  
321 Triton X-100 (left) or digitonin (right) then labeled for BrU (green) and N (red), DAPI labeling the nuclei  
322 (blue). Scale bars represent 5  $\mu$ m.

323

## 324 Discussion

325 The formation of ROs is conserved across all +RNA viruses, an essential step in their life  
326 cycle. These ROs have long been thought to provide a site for viral RNA synthesis and in  
327 fact have been shown to do so for several viruses [8, 30, 31]. While these structures do vary  
328 between the different virus families, there are many similarities, the most basic of them being  
329 the energy required to rearrange cellular membranes to this extent. As obligate intracellular

330 parasites, viruses are highly efficient and aim entirely to produce new generations of  
331 infectious particles as soon as possible. That these viruses induce these structures at all  
332 indicates that they are an important step in their life cycle [41, 43]. The gammacoronavirus,  
333 IBV induces the formation of DMVs, zER and spherules which pinch out from, but remain  
334 tethered to the zER. While IBV DMVs were recently identified as a site for viral RNA  
335 synthesis, no role has yet been found for spherules [8].

336 Previous studies have shown for other +RNA viruses such as SARS-CoV, FHV, and  
337 most recently in SARS-CoV-2 that dsRNA is found associated with DMVs [30, 31, 39, 40]. In  
338 the current study we have shown using different permeabilization methods, that dsRNA is  
339 found located within membrane-bound compartments. This is consistent with previous work  
340 [39] and suggests that dsRNA is also shielded within DMVs during IBV infection. Although a  
341 pore has recently been shown to be present in the DMV membrane [44], these are short  
342 lived/transient and have a diameter of 2-3nm at their narrowest point, which would not be  
343 large enough to allow entry of an antibody complex of ~30 nm. It is worth noting however,  
344 that our data here cannot exclude the possibility of dsRNA association with spherules. The  
345 IBV spherule neck measured 4-5 nm [37], which would also not be large enough to allow  
346 entry of an antibody complex. As dsRNA is a known target for intracellular pattern  
347 recognition receptors, it is likely that the virus aims to shield the dsRNA from detection within  
348 membrane-bound compartments such as DMVs. Indeed, activation of interferon (IFN)  
349 signaling is delayed following IBV infection and it was suggested that the IFN response then  
350 seen later in IBV infection could be due to dsRNA “leaking” from DMVs [51]. However, this  
351 now does not seem to be the case as data presented in the current work demonstrated that  
352 dsRNA was sealed within a membrane compartment at 24 hpi, a timepoint after which IFN  
353 signaling has been activated. Therefore, other mechanisms must exist to allow activation of  
354 IFN signaling later in IBV infection and these remain to be elucidated.

355 Finding sites of coronavirus RNA synthesis has been a topic of much research in recent  
356 years. Using biochemical methods *in vitro*, it has been shown that SARS-CoV RNA  
357 synthesis takes place inside membrane-bound compartments [38]. More recently, it was  
358 shown that DMVs are the site of viral RNA synthesis during MERS-CoV and IBV replication  
359 [8]. However, the methods used in that study could not definitively show whether RNA  
360 synthesis takes place on the interior or cytoplasmic face of DMV membranes. A subsequent  
361 study showed that DMVs contain pores within the membrane connecting the interior of the  
362 vesicle with the cytoplasm [44], providing a route by which RNA synthesized inside DMVs  
363 could exit for translation or packaging. Despite this, the location of viral RNA synthesis either  
364 inside or on the outside of DMVs remained to be confirmed. Significantly, here, by employing  
365 both BrU labeling of nascent RNA and different permeabilization methods, we have shown  
366 that sites of coronavirus RNA synthesis are membrane protected. Therefore, we have  
367 demonstrated conclusively that viral RNA synthesis in fact takes place *within* a membrane  
368 membrane-bound compartment. Moreover, we have confirmed that viral RNA synthesis by  
369 diverse CoVs from each of the four coronavirus genera, including recently identified  
370 SARS-CoV-2, takes place within a membrane-bound compartment. Although we cannot  
371 exclude that CoV RNA synthesis takes place associated with spherules, as MERS-CoV and

372 IBV RNA synthesis has been shown to be associated with DMVs [8], we can infer here that  
373 RNA synthesis takes place *within* DMVs, and that this is conserved across the whole CoV  
374 family.

375 While it has previously been shown that newly synthesized IBV RNA location overlaps  
376 to some extent with the nsp14 [52], little else is known about the localization of viral proteins  
377 to sites of viral RNA synthesis. Several viral nsps are known to be involved in RO formation,  
378 including nsp3, nsp4 and nsp6 [39, 41, 43, 53-55] and nsps are known to localize to DMVs  
379 and other RO membranes [34, 39, 56]. Here, we have shown that viral RNA is associated  
380 with dsRNA but not with nsp12. While it was not surprising that as a replicative intermediate,  
381 dsRNA was found in close association with sites of viral RNA synthesis, the finding that  
382 nsp12 is not near these sites is somewhat surprising. However, this is likely to be because  
383 the antibody is unable to bind to nsp12 assembled within the replication/transcription  
384 complex (RTC) and actively involved in RNA synthesis. Nsp8 has been shown to interact  
385 with both the N- and C-terminal ends of nsp12 [57] which could very likely render the  
386 antigenic sites within nsp12 inaccessible to something as large as an antibody. Nsp12 also  
387 interacts directly with other viral proteins. MHV nsp12 interacts with nsp15 [58] and possibly  
388 with nsp5, nsp8 and nsp9 [59]. SARS-CoV nsp12 has been found in complex with nsp7,  
389 nsp8 and nsp14 [60]. Therefore, it is very likely that the nsp12 labeling detected here  
390 represents nsp12 that is not located within RTCs or is located within RTCs not actively  
391 involved in RNA synthesis. The amount of nsp12 signal detected that is presumably not  
392 located within active RTCs is perhaps rather surprising. However, several nsps from other  
393 CoVs are known to localize to both DMVs and other RO membranes [34, 39, 56]. The role of  
394 non-RTC associated nsp12 during virus replication remains to be determined.

395 Following characterization of the location of nascent RNA throughout infection, changes  
396 in the location of this RNA as infection progressed were studied. Using a pulse-chase  
397 approach, RNA synthesized between 7-8 hpi was visualized at 24 hpi. This demonstrated  
398 that by 24 hpi, viral RNA that was produced between 7-8 hpi showed two separate pools.  
399 The first remained in large, membrane-bound foci. These large accumulations of labeled  
400 viral RNA continued to associate with dsRNA within these compartments. The second pool  
401 of viral RNA produced between 7-8 hpi and tracked to 24 hpi had been exported into the  
402 cytoplasm. This pool of RNA is associated largely with structural proteins, presumably  
403 bound by N, or as it was being packaged into new virions and is consistent with the recently  
404 characterized pore in the DMV membrane [44]. These observations are consistent with a  
405 model whereby newly synthesized positive sense RNAs are exported out of the DMV to be  
406 translated or packaged, while positive and negative sense RNA templates remain within the  
407 DMVs for further rounds of RNA synthesis.

408 The CoV family contains many pathogens of animal and human interest. The RO of  
409 CoVs from all four genera have been confirmed previously to comprise DMVs and double  
410 membrane spherules. Here we investigated the site of viral RNA synthesis of one virus from  
411 each CoV genus. In all viruses we investigated (HCoV 229E, SARS-CoV-2, IBV and  
412 PDCoV) the site of viral RNA synthesis was bound within a membrane, consistent with being  
413 located on the interior of DMVs [8, 44]. The role of CoV induced convoluted membranes,

414 zippered ER and double membrane spherules remains elusive. However, knowing that all  
415 CoVs synthesize viral RNA within a membrane-bound compartment is a significant step in  
416 understanding the replication of this important virus family.  
417

418 **Supplementary Materials:** The following are available online at  
419 [www.mdpi.com/xxx/s1](http://www.mdpi.com/xxx/s1), Figure S1: Cellular transcription is inhibited with  
420 Actinomycin D treatment, Figure S2: Sites of viral RNA synthesis are  
421 associated with dsRNA but do not colocalize with nsp12., Video S3: Sites of  
422 viral RNA synthesis do not colocalize with nsp12; Video S4: Sites of viral RNA  
423 synthesis are associated with dsRNA.

424 **Author Contributions:** Conceptualization, H.J.M. and P.C.H. methodology,  
425 N.D., J.S., P.C.H. and H.J.M.; validation, N.D.; formal analysis, N.D.;  
426 investigation, N.D.; resources, N.D., P.C.H. and H.J.M.; data curation, N.D.;  
427 writing—original draft preparation, N.D. and H.J.M.; writing—review and  
428 editing, N.D., J.S., P.C.H., and H.J.M.; visualization, N.D.; supervision, H.J.M.;  
429 project administration, H.J.M.; funding acquisition, H.J.M. All authors have read  
430 and agreed to the published version of the manuscript.

431 **Funding:** This research was funded by Biotechnology and Biological Sciences  
432 Research Council, grant numbers BB/N002350/1, BBS/E/I/00002535,  
433 BBS/E/I/00007034, BBS/E/I/00007038 and BBS/E/I/00007039.

434 **Acknowledgments:** The authors would like to thank Prof Linda Saif, Ohio  
435 State University, for kindly providing porcine deltacoronavirus for use in this  
436 work. We would also like to thank Prof Miles Carroll, UK Health Security  
437 Agency, for kindly sharing SARS-CoV-2, hCov-19/England/02/2020.

438 **Conflicts of Interest:** The authors declare no conflicts of interest. The funders  
439 had no role in the design of the study; in the collection, analyses, or  
440 interpretation of data; in the writing of the manuscript, or in the decision to  
441 publish the results.

## 442 References

- 443
- 444 1. Ksiazek, T.G., Erdman, D. *et al.* A Novel Coronavirus Associated with Severe Acute  
445 Respiratory Syndrome. *New England Journal of Medicine*, **2003**. 348(20): p.  
446 1953-1966.
  - 447 2. Zaki, A.M., van Boheemen, S. *et al.* Isolation of a Novel Coronavirus from a Man with  
448 Pneumonia in Saudi Arabia. *New England Journal of Medicine*, **2012**. 367(19): p.  
449 1814-1820.
  - 450 3. W.H.O. *World Health Organisation (WHO) Coronavirus (COVID-19) Dashboard With*  
451 *Vaccination Data*. 2021 August 2021]; Available from: <https://covid19.who.int>.
  - 452 4. Zhou, P., Yang, X.-L. *et al.* A pneumonia outbreak associated with a new coronavirus  
453 of probable bat origin. *Nature*, **2020**. 579(7798): p. 270-273.
  - 454 5. Miller, S. and Krijnse-Locker, J. Modification of intracellular membrane structures for  
455 virus replication. *Nature Reviews Microbiology*, **2008**. 6(5): p. 363-374.
  - 456 6. Nagy, P.D., Strating, J.R.P.M. *et al.* Building Viral Replication Organelles: Close  
457 Encounters of the Membrane Types. *PLOS Pathogens*, **2016**. 12(10): p. e1005912.
  - 458 7. Netherton, C.L. and Wileman, T. Virus factories, double membrane vesicles and  
459 viroplasm generated in animal cells. *Current Opinion in Virology*, **2011**. 1(5): p.  
460 381-387.
  - 461 8. Snijder, E., Limpens, R.W.A.L. *et al.* A unifying structural and functional model of the  
462 coronavirus replication organelle: tracking down RNA synthesis. 2020, bioRxiv.



- 463 9. Gosert, R., Kanjanahaluethai, A. *et al.* RNA Replication of Mouse Hepatitis Virus  
464 Takes Place at Double-Membrane Vesicles. *Journal of Virology*, **2002**. 76(8): p.  
465 3697-3708.
- 466 10. Boon, J.A.d. and Ahlquist, P. Organelle-Like Membrane Compartmentalization of  
467 Positive-Strand RNA Virus Replication Factories. *Annual Review of Microbiology*,  
468 **2010**. 64(1): p. 241-256.
- 469 11. Neufeldt, C.J., Joyce, M.A. *et al.* The Hepatitis C Virus-Induced Membranous Web  
470 and Associated Nuclear Transport Machinery Limit Access of Pattern Recognition  
471 Receptors to Viral Replication Sites. *PLoS Pathogens*, **2016**. 12(2): p. e1005428.
- 472 12. Nagy, P.D. and Lin, W. Taking over Cellular Energy-Metabolism for TBSV  
473 Replication: The High ATP Requirement of an RNA Virus within the Viral Replication  
474 Organelle. *Viruses*, **2020**. 12(1): p. 56.
- 475 13. Harak, C. and Lohmann, V. Ultrastructure of the replication sites of positive-strand  
476 RNA viruses. *Virology*, **2015**. 479-480: p. 418-433.
- 477 14. Paul, D. and Bartenschlager, R. Architecture and biogenesis of plus-strand RNA  
478 virus replication factories. *World J Virol*, **2013**. 2(2): p. 32-48.
- 479 15. Ávila-Pérez, G., Rejas, M.T. *et al.* Ultrastructural characterization of membranous  
480 torovirus replication factories. *Cellular Microbiology*, **2016**. 18(12): p. 1691-1708.
- 481 16. Gosert, R., Egger, D. *et al.* Identification of the Hepatitis C Virus RNA Replication  
482 Complex in Huh-7 Cells Harboring Subgenomic Replicons. *Journal of Virology*,  
483 **2003**. 77(9): p. 5487-5492.
- 484 17. Monaghan, P., Cook, H. *et al.* The ultrastructure of the developing replication site in  
485 foot-and-mouth disease virus-infected BHK-38 cells. *Journal of General Virology*,  
486 **2004**. 85(4): p. 933-946.
- 487 18. Belov, G.A., Nair, V. *et al.* Complex Dynamic Development of Poliovirus  
488 Membranous Replication Complexes. *Journal of Virology*, **2012**. 86(1): p. 302-312.
- 489 19. Limpens, R.W.A.L., Schaar, H.M.v.d. *et al.* The Transformation of Enterovirus  
490 Replication Structures: a Three-Dimensional Study of Single- and  
491 Double-Membrane Compartments. *mBio*, **2011**. 2(5): p. e00166-00111.
- 492 20. Melia, C.E., Peddie, C.J. *et al.* Origins of Enterovirus Replication Organelles  
493 Established by Whole-Cell Electron Microscopy. *mBio*, **2019**. 10(3): p.  
494 e00951-00919.
- 495 21. Cortese, M., Goellner, S. *et al.* Ultrastructural Characterization of Zika Virus  
496 Replication Factories. *Cell Reports*, **2017**. 18(9): p. 2113-2123.
- 497 22. Gillespie, L.K., Hoenen, A. *et al.* The Endoplasmic Reticulum Provides the  
498 Membrane Platform for Biogenesis of the Flavivirus Replication Complex. *Journal of*  
499 *Virology*, **2010**. 84(20): p. 10438-10447.
- 500 23. Offerdahl, D.K., Dorward, D.W. *et al.* A three-dimensional comparison of tick-borne  
501 flavivirus infection in mammalian and tick cell lines. *PLoS One*, **2012**. 7(10): p.  
502 e47912.
- 503 24. Welsch, S., Miller, S. *et al.* Composition and Three-Dimensional Architecture of the  
504 Dengue Virus Replication and Assembly Sites. *Cell Host & Microbe*, **2009**. 5(4): p.  
505 365-375.

- 506 25. Schwartz, M., Chen, J. *et al.* Alternate, virus-induced membrane rearrangements  
507 support positive-strand RNA virus genome replication. *Proceedings of the National*  
508 *Academy of Sciences of the United States of America*, **2004**. 101(31): p.  
509 11263-11268.
- 510 26. Grimley, P.M., Berezsky, I.K. *et al.* Cytoplasmic structures associated with an  
511 arbovirus infection: loci of viral ribonucleic acid synthesis. *J Virol*, **1968**. 2(11): p.  
512 1326-1338.
- 513 27. Grimley, P.M., Levin, J.G. *et al.* Specific membranous structures associated with the  
514 replication of group A arboviruses. *J Virol*, **1972**. 10(3): p. 492-503.
- 515 28. Kujala, P., Ikäheimonen, A. *et al.* Biogenesis of the Semliki Forest virus RNA  
516 replication complex. *J Virol*, **2001**. 75(8): p. 3873-3884.
- 517 29. Miller, D.J., Schwartz, M.D. *et al.* Flock House Virus RNA Replicates on Outer  
518 Mitochondrial Membranes in *Drosophila* Cells. *Journal of Virology*, **2001**. 75(23): p.  
519 11664-11676.
- 520 30. Ertel, K.J., Benefield, D. *et al.* Cryo-electron tomography reveals novel features of a  
521 viral RNA replication compartment. *eLife*, **2017**. 6: p. e25940.
- 522 31. Kopek, B.G., Perkins, G. *et al.* Three-dimensional analysis of a viral RNA replication  
523 complex reveals a virus-induced mini-organelle. *PLoS Biol*, **2007**. 5(9): p. e220.
- 524 32. de Wilde, A.H., Raj, V.S. *et al.* MERS-coronavirus replication induces severe in vitro  
525 cytopathology and is strongly inhibited by cyclosporin A or interferon- $\alpha$  treatment. *J*  
526 *Gen Virol*, **2013**. 94(Pt 8): p. 1749-1760.
- 527 33. Goldsmith, C.S., Tatti, K.M. *et al.* Ultrastructural Characterization of SARS  
528 Coronavirus. *Emerging Infectious Disease journal*, **2004**. 10(2): p. 320.
- 529 34. Snijder, E.J., van der Meer, Y. *et al.* Ultrastructure and Origin of Membrane Vesicles  
530 Associated with the Severe Acute Respiratory Syndrome Coronavirus Replication  
531 Complex. *Journal of Virology*, **2006**. 80(12): p. 5927-5940.
- 532 35. Zhou, X., Cong, Y. *et al.* Ultrastructural Characterization of Membrane  
533 Rearrangements Induced by Porcine Epidemic Diarrhea Virus Infection. *Viruses*,  
534 **2017**. 9(9): p. 251.
- 535 36. Doyle, N., Hawes, P.C. *et al.* The Porcine Deltacoronavirus Replication Organelle  
536 Comprises Double-Membrane Vesicles and Zippered Endoplasmic Reticulum with  
537 Double-Membrane Spherules. *Viruses*, **2019**. 11(11): p. 1030.
- 538 37. Maier, H.J., Hawes, P.C. *et al.* Infectious Bronchitis Virus Generates Spherules from  
539 Zippered Endoplasmic Reticulum Membranes. *mBio*, **2013**. 4(5).
- 540 38. van Hemert, M.J., van den Worm, S.H.E. *et al.* SARS-Coronavirus  
541 Replication/Transcription Complexes Are Membrane-Protected and Need a Host  
542 Factor for Activity In Vitro. *PLOS Pathogens*, **2008**. 4(5): p. e1000054.
- 543 39. Knoops, K., Kikkert, M. *et al.* SARS-Coronavirus Replication Is Supported by a  
544 Reticulovesicular Network of Modified Endoplasmic Reticulum. *PLOS Biology*, **2008**.  
545 6(9): p. e226.
- 546 40. Klein, S., Cortese, M. *et al.* SARS-CoV-2 structure and replication characterized by  
547 in situ cryo-electron tomography. *Nature Communications*, **2020**. 11(1): p. 5885.

- 548 41. Gadlage, M.J., Sparks, J.S. *et al.* Murine Hepatitis Virus Nonstructural Protein 4  
549 Regulates Virus-Induced Membrane Modifications and Replication Complex  
550 Function. *Journal of Virology*, **2010**. 84(1): p. 280-290.
- 551 42. Meer, Y.v.d., Snijder, E.J. *et al.* Localization of Mouse Hepatitis Virus Nonstructural  
552 Proteins and RNA Synthesis Indicates a Role for Late Endosomes in Viral  
553 Replication. *Journal of Virology*, **1999**. 73(9): p. 7641-7657.
- 554 43. Lundin, A., Dijkman, R. *et al.* Targeting Membrane-Bound Viral RNA Synthesis  
555 Reveals Potent Inhibition of Diverse Coronaviruses Including the Middle East  
556 Respiratory Syndrome Virus. *PLoS Pathog*, **2014**. 10(5): p. e1004166.
- 557 44. Wolff, G., Limpens, R.W.A.L. *et al.* A molecular pore spans the double membrane of  
558 the coronavirus replication organelle. *Science*, **2020**. 369(6509): p. 1395-1398.
- 559 45. Casais, R., Thiel, V. *et al.* Reverse Genetics System for the Avian Coronavirus  
560 Infectious Bronchitis Virus. *Journal of Virology*, **2001**. 75(24): p. 12359-12369.
- 561 46. Hull, R.N., Cherry, W.R. *et al.* The origin and characteristics of a pig kidney cell  
562 strain, LLC-PK. *In Vitro*, **1976**. 12(10): p. 670-677.
- 563 47. Hu, H., Jung, K. *et al.* Isolation and characterization of porcine deltacoronavirus from  
564 pigs with diarrhea in the United States. *J Clin Microbiol*, **2015**. 53(5): p. 1537-1548.
- 565 48. Jung, K., Hu, H. *et al.* Pathogenicity of 2 porcine deltacoronavirus strains in  
566 gnotobiotic pigs. *Emerg Infect Dis*, **2015**. 21(4): p. 650-654.
- 567 49. Hagemeyer, M.C., Vonk, A.M. *et al.* Visualizing Coronavirus RNA Synthesis in Time  
568 by Using Click Chemistry. *Journal of Virology*, **2012**. 86(10): p. 5808-5816.
- 569 50. Hackbart, M., Deng, X. *et al.* Coronavirus endoribonuclease targets viral polyuridine  
570 sequences to evade activating host sensors. *Proceedings of the National Academy  
571 of Sciences*, **2020**. 117(14): p. 8094-8103.
- 572 51. Kint, J., Fernandez-Gutierrez, M. *et al.* Activation of the Chicken Type I Interferon  
573 Response by Infectious Bronchitis Coronavirus. *Journal of Virology*, **2015**. 89(2): p.  
574 1156-1167.
- 575 52. Xu, L., Khadijah, S. *et al.* The Cellular RNA Helicase DDX1 Interacts with  
576 Coronavirus Nonstructural Protein 14 and Enhances Viral Replication. *Journal of  
577 Virology*, **2010**. 84(17): p. 8571-8583.
- 578 53. Beachboard, D.C., Anderson-Daniels, J.M. *et al.* Mutations across Murine Hepatitis  
579 Virus nsp4 Alter Virus Fitness and Membrane Modifications. *Journal of Virology*,  
580 **2015**. 89(4): p. 2080-2089.
- 581 54. Clementz, M.A., Kanjanahaluethai, A. *et al.* Mutation in murine coronavirus  
582 replication protein nsp4 alters assembly of double membrane vesicles. *Virology*,  
583 **2008**. 375(1): p. 118-129.
- 584 55. Doyle, N., Neuman, B. *et al.* Infectious Bronchitis Virus Nonstructural Protein 4 Alone  
585 Induces Membrane Pairing. *Viruses*, **2018**. 10(9): p. 477.
- 586 56. Hagemeyer, M.C., Monastyrska, I. *et al.* Membrane rearrangements mediated by  
587 coronavirus nonstructural proteins 3 and 4. *Virology*, **2014**. 458-459: p. 125-135.
- 588 57. Tan, Y.W., Fung, T.S. *et al.* Coronavirus infectious bronchitis virus non-structural  
589 proteins 8 and 12 form stable complex independent of the non-translated regions of  
590 viral RNA and other viral proteins. *Virology*, **2018**. 513: p. 75-84.

- 591 58. Athmer, J., Fehr, A.R. *et al.* *In Situ* Tagged nsp15 Reveals Interactions with  
592 Coronavirus Replication/Transcription Complex-Associated Proteins. *mBio*, **2017**.  
593 8(1): p. e02320-02316.
- 594 59. Brockway, S.M., Lu, X.T. *et al.* Intracellular Localization and Protein Interactions of  
595 the Gene 1 Protein p28 during Mouse Hepatitis Virus Replication. *Journal of*  
596 *Virology*, **2004**. 78(21): p. 11551-11562.
- 597 60. Subissi, L., Posthuma, C.C. *et al.* One severe acute respiratory syndrome  
598 coronavirus protein complex integrates processive RNA polymerase and  
599 exonuclease activities. *Proceedings of the National Academy of Sciences*, **2014**.  
600 111(37): p. E3900-E3909.  
601  
602
